# Supplementary material for: Coupling Process-Based Models and Machine Learning Algorithms for Predicting Yield and Evapotranspiration of Maize in Arid Environments
Source: MDPI journal article supplement (doi:10.3390/w14223647), 2022-11-12
Supplement: s1 [file s1]

Archive with 1 entries (1 files):
- water-2027494-supplementary.pdf
