# Supplementary material for: Coupling Process-Based Models and Machine Learning Algorithms for Predicting Yield and Evapotranspiration of Maize in Arid Environments
Source: MDPI journal article supplement (doi:10.3390/w14223647), 2022-11-12
Supplement: s1 [file s1 › water-2027494-supplementary.pdf]

*Supplementary Materials*

# Coupling Process-Based Models and Machine Learning Algorithms for Predicting Yield and Evapotranspiration of Maize in Arid Environments

Ahmed Attia <sup>1</sup>, Ajit Govind <sup>2</sup>, Asad Sarwar Qureshi <sup>1</sup>, Til Feike <sup>3</sup>, Mosa Sayed Rizk <sup>4</sup>, Mahmoud M. A. Shabana <sup>5</sup> and Ahmed M.S. Kheir <sup>2,5,\*</sup>

<sup>1</sup> Sustainable Natural Resources Management Section, International Center for Biosaline Agriculture, Dubai 14660, United Arab Emirates

<sup>2</sup> International Center for Agricultural Research in the Dry Areas (ICARDA), Maadi, 11728, Egypt

<sup>3</sup> Julius Kühn Institute (JKI)—Federal Research Centre for Cultivated Plants, Institute for Strategies and Technology Assessment, 14532 Kleinmachnow, Germany

<sup>4</sup> Maize Research Department, Field Crops Research Institute, Agricultural Research Center, 33717, Egypt

<sup>5</sup> Soils, Water and Environment Research Institute, Agricultural Research Center, 9 Cairo University Street, 12112 Giza, Egypt

\* Correspondence: a.kheir@cgiar.org or draahmedkheir2015@gmail.com; Tel.: +20-1011329465

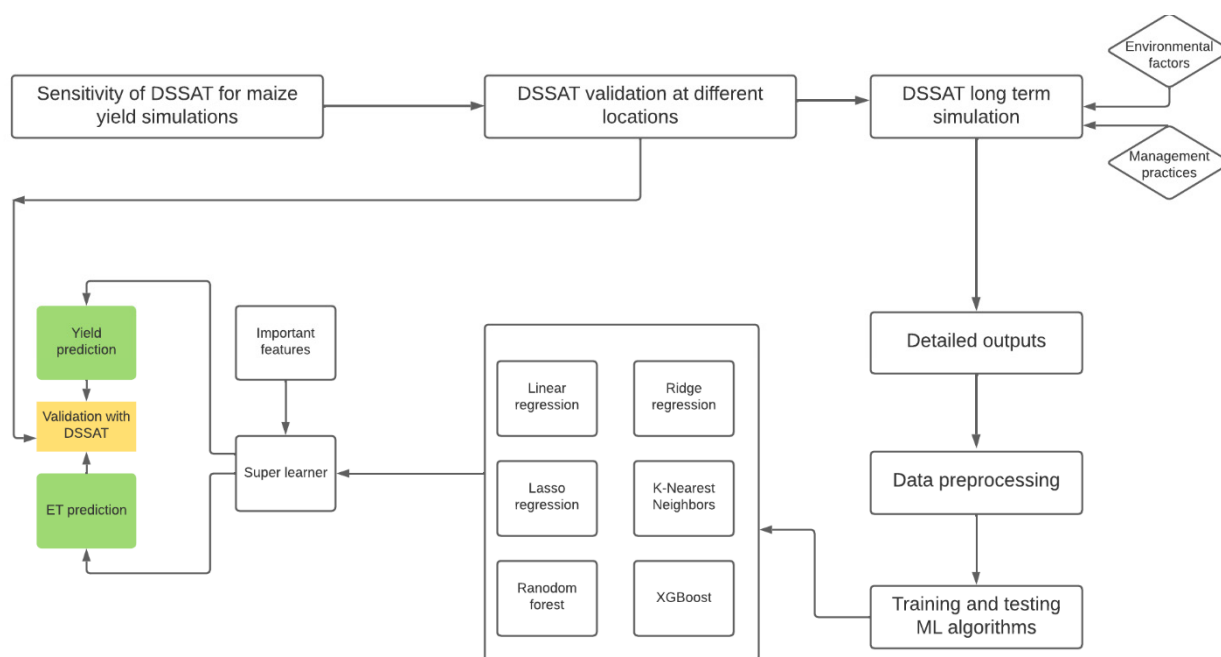

**Figure S1.** Flowchart summarizes the study road map for modeling and machine learning simulations.

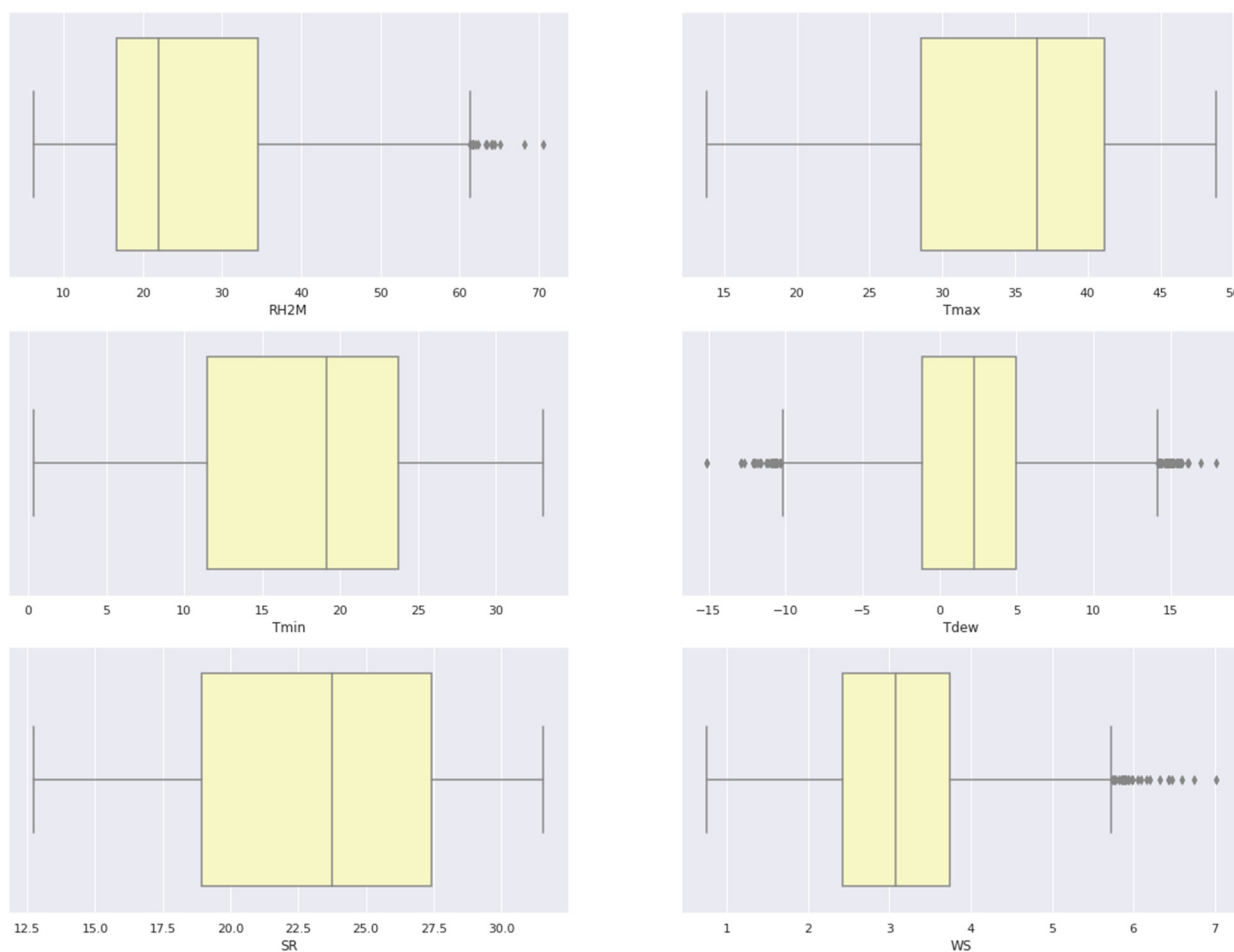

**Figure S2A.** Box plots of relative humidity, RH2M (%), maximum temperature, Tmax ( $^{\circ}\text{C}$ ), Tmin, Tmin ( $^{\circ}\text{C}$ ), dew point temperature, Tdew ( $^{\circ}\text{C}$ ), solar radiation, SR ( $\text{MJ m}^{-2} \text{ day}^{-1}$ ), and wind speed, WS ( $\text{m s}^{-1}$ ) for Aswan location over 31 years (1991–2020).

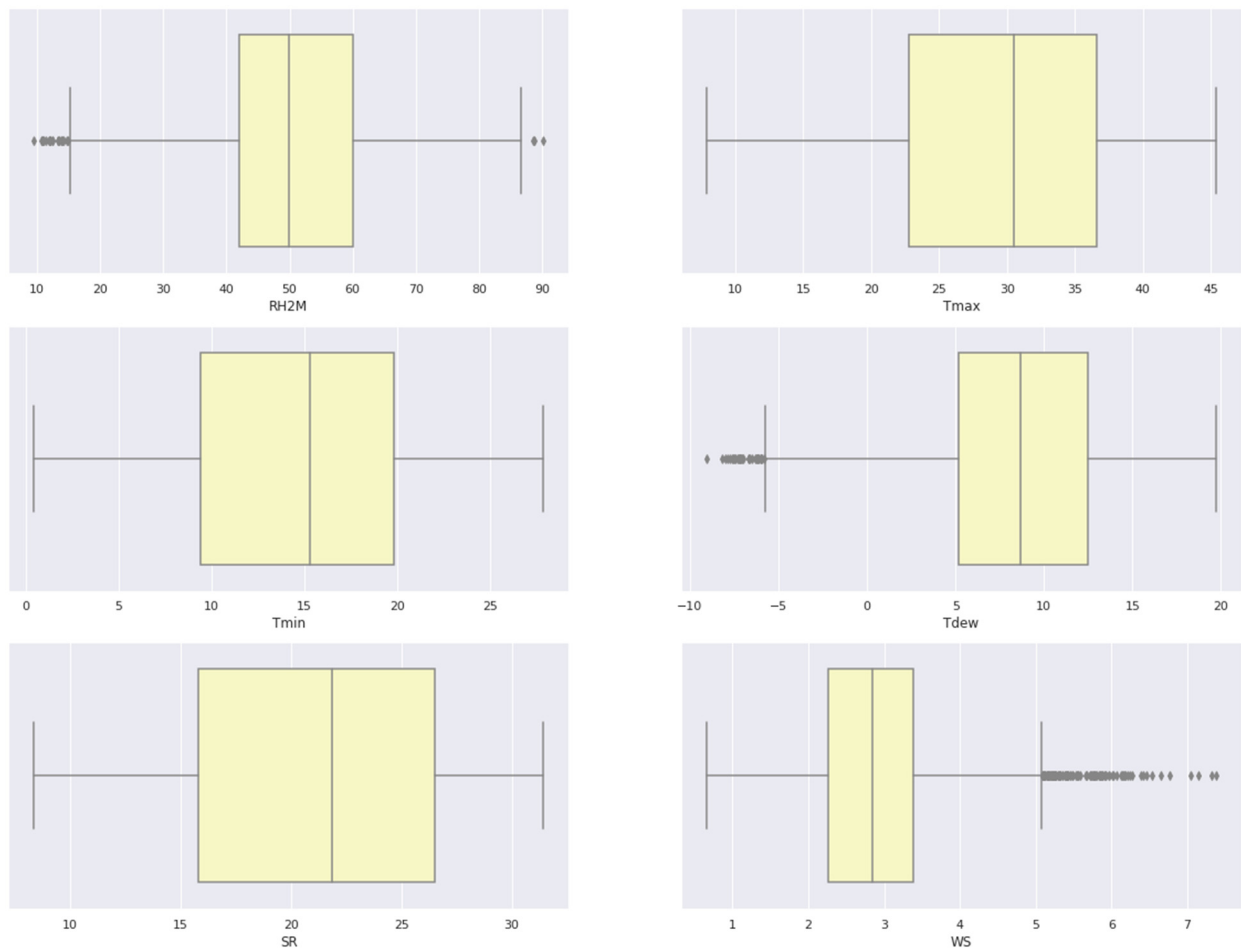

**Figure S2B.** Box plots of relative humidity, RH2M (%), maximum temperature, Tmax ( $^{\circ}\text{C}$ ), Tmin, Tmin ( $^{\circ}\text{C}$ ), dew point temperature, Tdew ( $^{\circ}\text{C}$ ), solar radiation, SR ( $\text{MJ m}^{-2} \text{ day}^{-1}$ ), and wind speed, WS ( $\text{m s}^{-1}$ ) for Giza location over 31 years (1991–2020).

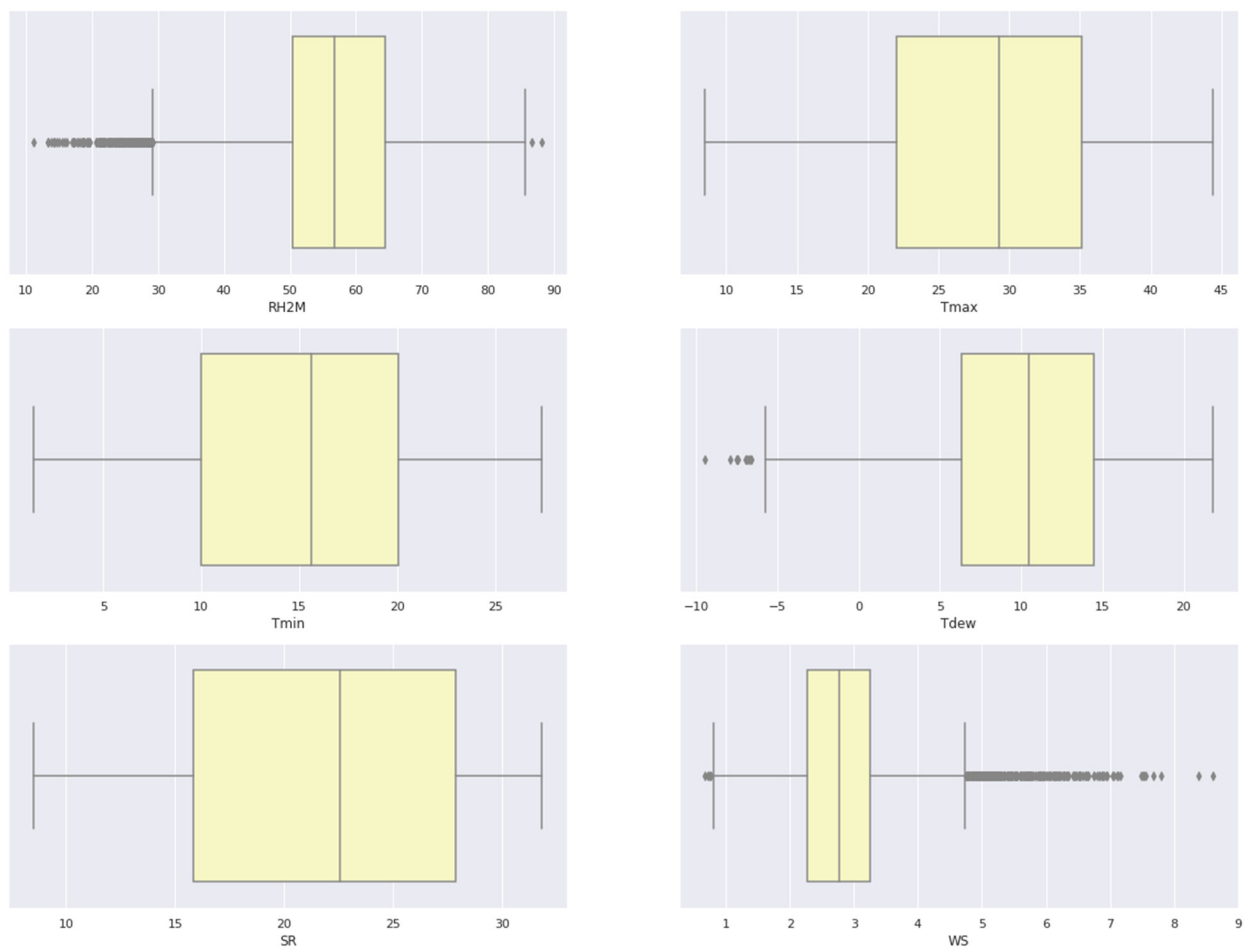

**Figure S2C.** Box plots of relative humidity, RH2M (%), maximum temperature, Tmax (°C), Tmin, Tmin (°C), dew point temperature, Tdew (°C), solar radiation, SR (MJ m<sup>-2</sup> day<sup>-1</sup>), and wind speed, WS (m s<sup>-1</sup>) for Ismalia location over 31 years (1991–2020).

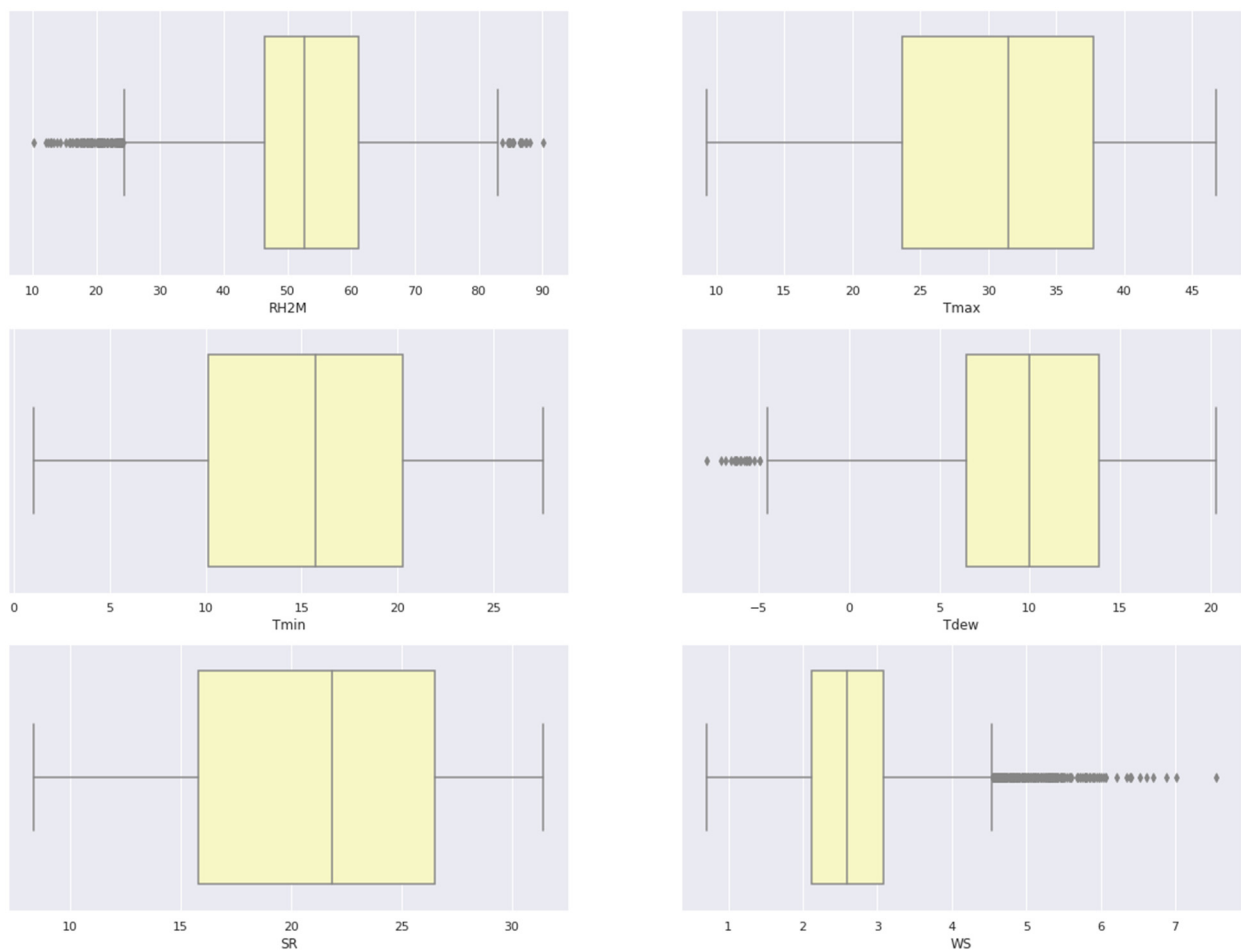

**Figure S2D.** Box plots of relative humidity, RH2M (%), maximum temperature, Tmax (°C), Tmin, Tmin (°C), dew point temperature, Tdew (°C), solar radiation, SR (MJ m<sup>-2</sup> day<sup>-1</sup>), and wind speed, WS (m s<sup>-1</sup>) for Sharqia location over 31 years (1991–2020).

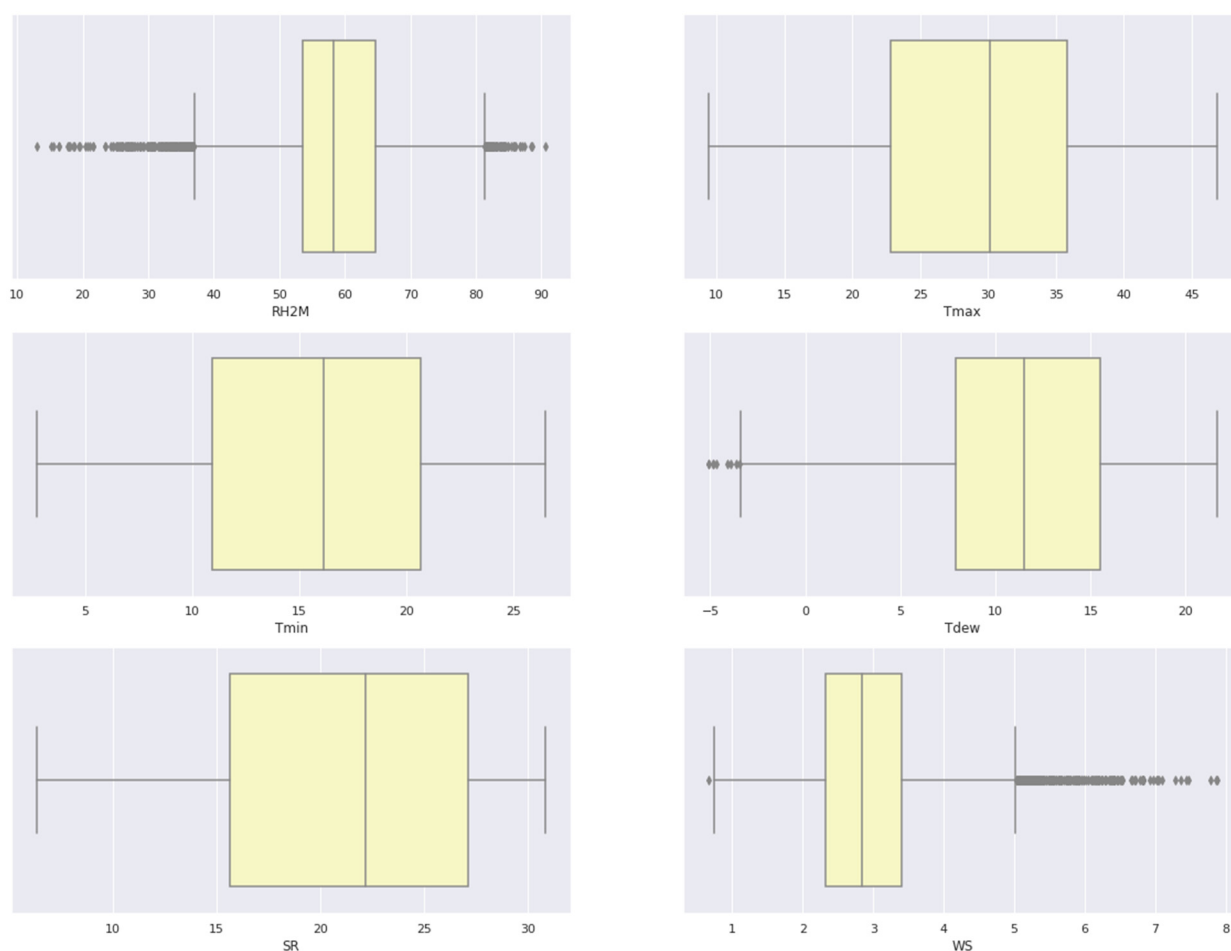

**Figure S2E.** Box plots of relative humidity, RH2M (%), maximum temperature, Tmax (°C), Tmin, Tmin (°C), dew point temperature, Tdew (°C), solar radiation, SR (MJ m<sup>-2</sup> day<sup>-1</sup>), and wind speed, WS (m s<sup>-1</sup>) for Sakha location over 31 years (1991–2020).

**Table S1.** Goodness-of-fit statistics of calibration and evaluation of the DSSAT model of anthesis and maturity dates, maximum leaf area index (Max LAI), final biomass, grain yield, and evapotranspiration (ET, mm) under non-stress (I1) and stress (I2) conditions.

| Feature  | RMSE       | nRMSE (%) | MPE (%) |
|----------|------------|-----------|---------|
| Anthesis | 5.2 days   | 9.4       | 8.8     |
| Maturity | 4.6 days   | 5.1       | 1.9     |
| GY       | 680 kg/ha  | 15.7      | 1.16    |
| Biomass  | 1300 kg/ha | 30.7      | 29.9    |
| LAIx     | 0.33       | 12.8      | 10.4    |
| ET(I1)   | 53 mm      | 8.8       | -4.0    |
| ET(I2)   | 80 mm      | 17.9      | -7.0    |
